# Supplementary material for: Roosters do not warn the bird in the mirror: The cognitive ecology of mirror self-recognition
Source: PLoS One. 2023 Oct 25;18(10):e0291416. doi: 10.1371/journal.pone.0291416 (PMC10599514; doi:10.1371/journal.pone.0291416)
Supplement: S4 Table — Frequency scoring of 14 behaviors and the duration of the time each animal spent facing the mirror. N/A (not applicable) for damaged video files. (XLSX) [file pone.0291416.s004.xlsx]

## Sheet: untereinander_9999
Habituation_session_number	Habituation	ID	preening_mark_facing_mirror_frequency	preening_other_bodyparts_facing_mirror_frequency	preening_mark_away_from_mirror_frequency	preening_other_bodyparts_away_from_mirror_frequency	time_facing_mirror (s)	pecks_mirror/grid	fights_mirror/grid	pecks_floor	pecks_wall	head_turning	turning_clockwise	turning_anticlockwise	crowing	plumage_ruffling	head_shaking
2	1. mirror	B1	0	0	0	0	442	0	0	0	0	16	3	1	0	1	0
2	1. mirror	B2	0	1	0	0	652.674	0	0	6	1	37	6	2	14	2	26
2	1. mirror	B3	1	16	0	4	730.571	0	0	2	0	47	1	1	0	1	7
2	1. mirror	B4	1	7	0	6	736.771	2	0	0	15	49	0	1	0	0	4
2	1. mirror	B5	0	2	0	0	897.331	5	0	0	0	56	0	0	3	1	3
2	1. mirror	LB1	0	0	0	4	466.248	0	0	0	6	21	0	5	21	6	0
2	1. mirror	LB2	N/A	N/A	N/A	N/A	N/A	N/A	N/A	N/A	N/A	N/A	N/A	N/A	N/A	N/A	N/A
2	1. mirror	LB3	N/A	N/A	N/A	N/A	N/A	N/A	N/A	N/A	N/A	N/A	N/A	N/A	N/A	N/A	N/A
2	1. mirror	LB4	1	0	0	0	564.911	0	0	22	6	72	6	6	12	2	4
2	1. mirror	LB5	0	4	0	1	677.406	0	0	18	1	61	5	3	10	1	5
2	1. mirror	LB6	0	0	0	2	522.546	0	0	3	15	27	0	0	14	1	8
2	1. mirror	LB7	N/A	N/A	N/A	N/A	N/A	N/A	N/A	N/A	N/A	N/A	N/A	N/A	N/A	N/A	N/A
2	1. mirror	LB8	0	3	0	1	598.576	0	0	22	1	45	13	3	0	2	4
2	1. mirror	LB9	N/A	N/A	N/A	N/A	N/A	N/A	N/A	N/A	N/A	N/A	N/A	N/A	N/A	N/A	N/A
2	1. mirror	M1	0	0	0	0	317.021	0	0	3	0	3	1	0	0	2	0
2	1. mirror	M3	0	6	3	7	420.25	0	0	6	3	10	1	2	2	6	3
2	1. mirror	M4	0	3	0	3	340.786	0	0	37	6	37	3	4	3	0	1
2	1. mirror	M5	2	11	2	12	460.615	0	0	20	4	49	0	2	19	2	5
3	2. mirror	B1	0	0	0	2	666.873	0	0	16	0	24	0	0	1	1	1
3	2. mirror	B2	0	2	0	2	695.239	0	0	10	1	94	9	18	10	2	4
3	2. mirror	B3	5	5	0	20	563.911	0	0	3	0	72	0	0	0	0	1
3	2. mirror	B4	4	14	0	19	655.174	0	0	14	7	42	0	2	1	0	8
3	2. mirror	B5	0	0	0	1	886.165	10	0	5	0	47	0	0	2	0	1
3	2. mirror	LB1	0	0	0	7	469.581	0	0	10	6	27	0	3	21	6	3
3	2. mirror	LB2	0	0	0	0	557.111	0	1	14	5	22	0	0	4	7	6
3	2. mirror	LB3	0	2	0	1	710.838	0	0	4	1	87	7	11	17	5	6
3	2. mirror	LB4	0	0	0	3	631.641	0	0	31	0	33	3	0	1	3	4
3	2. mirror	LB5	0	4	0	4	538.312	0	1	30	0	45	10	12	2	4	4
3	2. mirror	LB6	1	8	0	9	566.577	0	0	4	0	16	0	6	13	2	5
3	2. mirror	LB7	0	13	2	9	547.145	0	0	6	0	15	0	0	1	1	3
3	2. mirror	LB8	0	1	0	0	442.882	0	0	70	3	28	17	9	2	5	8
3	2. mirror	LB9	0	0	0	1	595.51	0	0	17	2	25	6	5	17	3	6
3	2. mirror	M1	3	12	2	10	402.717	0	0	12	6	14	3	0	1	3	4
3	2. mirror	M3	1	5	2	9	160.727	0	0	2	9	5	1	0	6	4	1
3	2. mirror	M4	4	11	0	1	699.605	0	0	59	3	26	1	7	0	1	0
3	2. mirror	M5	3	13	4	14	557.644	2	1	4	2	27	1	0	7	2	1
4	3. mirror	B1	0	0	0	0	714.771	0	0	11	8	21	0	0	0	0	0
4	3. mirror	B2	1	12	0	16	623.342	0	0	21	5	50	5	14	15	1	17
4	3. mirror	B3	3	0	0	17	799.101	1	0	6	0	58	0	0	0	0	0
4	3. mirror	B4	0	0	0	1	697.705	0	0	7	18	32	0	5	0	0	4
4	3. mirror	B5	0	0	0	12	643.008	2	0	8	0	50	0	0	1	0	5
4	3. mirror	LB1	0	3	0	8	438.149	0	0	11	0	20	1	4	17	2	2
4	3. mirror	LB2	0	1	0	0	461.315	0	0	39	0	16	1	6	11	4	4
4	3. mirror	LB3	0	1	0	0	585.843	0	0	18	0	58	3	3	27	2	11
4	3. mirror	LB4	0	3	0	2	423.883	0	0	17	2	24	3	3	17	5	16
4	3. mirror	LB5	0	10	1	18	417.517	0	0	22	0	31	5	4	6	6	6
4	3. mirror	LB6	0	0	0	1	506.346	0	0	27	6	15	3	9	9	2	10
4	3. mirror	LB7	3	12	2	13	506.78	0	0	3	0	14	0	0	0	2	5
4	3. mirror	LB8	0	1	0	2	552.445	1	0	94	1	46	6	6	0	3	6
4	3. mirror	LB9	0	1	0	0	601.643	0	0	22	1	26	3	4	11	2	5
4	3. mirror	M1	0	1	0	1	576.777	0	0	16	8	15	0	1	2	3	1
4	3. mirror	M3	0	1	0	2	512.113	0	0	17	5	16	0	6	10	4	4
4	3. mirror	M4	0	1	0	2	622.975	0	0	114	2	35	0	10	0	1	3
4	3. mirror	M5	0	10	5	21	267.123	0	0	9	1	12	0	2	7	2	3
6	4. mirror_and_white_projection	B1	N/A	N/A	N/A	N/A	N/A	N/A	N/A	N/A	N/A	N/A	N/A	N/A	N/A	N/A	N/A
6	4. mirror_and_white_projection	B2	1	8	0	10	632.841	0	0	32	0	11	0	7	5	1	3
6	4. mirror_and_white_projection	B3	5	7	0	6	815.367	1	0	0	0	25	0	0	2	1	4
6	4. mirror_and_white_projection	B4	N/A	N/A	N/A	N/A	N/A	N/A	N/A	N/A	N/A	N/A	N/A	N/A	N/A	N/A	N/A
6	4. mirror_and_white_projection	B5	0	6	0	4	432.883	0	0	21	0	1	0	1	0	0	5
6	4. mirror_and_white_projection	LB1	N/A	N/A	N/A	N/A	N/A	N/A	N/A	N/A	N/A	N/A	N/A	N/A	N/A	N/A	N/A
6	4. mirror_and_white_projection	LB2	0	0	1	0	78.2969	0	0	4	0	0	0	0	7	2	2
6	4. mirror_and_white_projection	LB3	0	0	0	0	503.48	0	0	2	7	23	5	10	1	0	13
6	4. mirror_and_white_projection	LB4	N/A	N/A	N/A	N/A	N/A	N/A	N/A	N/A	N/A	N/A	N/A	N/A	N/A	N/A	N/A
6	4. mirror_and_white_projection	LB5	0	8	1	3	430.149	0	0	23	2	14	14	8	0	1	4
6	4. mirror_and_white_projection	LB6	1	11	0	10	560.211	0	0	3	0	15	1	4	11	3	6
6	4. mirror_and_white_projection	LB7	0	1	0	0	391.818	0	0	5	1	17	0	1	11	1	3
6	4. mirror_and_white_projection	LB8	1	0	0	0	555.411	1	0	24	6	32	6	16	9	3	13
6	4. mirror_and_white_projection	LB9	0	1	0	1	478.414	0	0	31	1	17	3	1	10	2	1
6	4. mirror_and_white_projection	M1	0	1	0	3	519.713	0	0	7	1	5	3	2	1	0	3
6	4. mirror_and_white_projection	M3	2	8	0	3	552.111	0	0	6	7	5	1	5	1	1	4
6	4. mirror_and_white_projection	M4	N/A	N/A	N/A	N/A	N/A	N/A	N/A	N/A	N/A	N/A	N/A	N/A	N/A	N/A	N/A
6	4. mirror_and_white_projection	M5	1	12	3	0	669.673	1	0	3	8	15	2	3	2	0	3
1	empty	B1	0	0	0	0	474.014	3	0	12	0	18	0	0	0	3	3
1	empty	B2	0	3	0	0	621.575	8	0	44	1	24	4	6	0	1	3
1	empty	B3	1	7	1	7	736.604	3	0	12	0	20	1	0	1	0	4
1	empty	B4	0	0	1	1	241.057	1	0	6	0	7	1	0	0	0	8
1	empty	B5	1	1	2	10	456.948	6	0	24	0	12	0	2	0	1	10
1	empty	LB1	0	1	0	4	562.511	0	0	77	0	32	1	12	17	3	4
1	empty	LB2	0	1	0	1	433.549	1	0	22	1	7	2	2	8	2	1
1	empty	LB3	1	4	0	5	415.983	0	0	29	1	19	0	4	0	1	3
1	empty	LB4	0	0	0	0	584.777	1	0	40	0	27	2	1	1	1	4
1	empty	LB5	0	8	0	3	562.911	0	0	15	1	23	1	1	2	2	4
1	empty	LB6	0	0	0	0	388.218	0	0	3	0	13	0	1	3	1	1
1	empty	LB7	0	14	4	5	367.985	0	0	9	0	7	0	0	5	1	5
1	empty	LB8	0	0	0	0	527.746	3	0	80	1	24	11	10	2	3	4
1	empty	LB9	0	2	0	1	436.083	0	0	21	1	10	1	3	8	1	2
1	empty	M1	0	0	0	1	375.685	0	0	28	0	13	2	0	4	1	2
1	empty	M3	0	0	0	0	577.844	3	0	5	5	14	0	1	10	3	3
1	empty	M4	0	1	0	0	648.674	3	0	38	0	11	1	4	0	1	1
1	empty	M5	0	4	0	4	367.952	7	0	12	2	11	0	2	12	1	3
5	white_projection	B1	1	0	0	0	612.076	0	0	1	0	12	0	0	0	0	3
5	white_projection	B2	0	0	0	10	608.442	0	0	12	2	37	4	7	9	0	4
5	white_projection	B3	0	0	0	1	833.1	0	0	0	1	19	0	0	0	0	0
5	white_projection	B4	0	7	5	15	347.886	0	0	13	0	5	0	1	1	0	0
5	white_projection	B5	1	3	0	10	457.682	3	0	14	2	22	0	0	0	0	15
5	white_projection	LB1	0	2	0	0	541.012	0	0	18	0	32	0	14	17	4	2
5	white_projection	LB2	0	0	0	3	462.748	0	0	22	0	30	2	5	9	4	3
5	white_projection	LB3	0	0	0	1	544.145	0	0	8	0	40	0	7	16	2	8
5	white_projection	LB4	0	1	0	0	325.287	1	0	19	0	12	0	4	10	2	4
5	white_projection	LB5	0	10	2	9	504.213	0	0	19	0	14	7	1	5	5	5
5	white_projection	LB6	0	2	0	3	571.677	0	0	10	0	27	9	3	10	1	2
5	white_projection	LB7	8	23	5	25	495.614	0	0	1	0	9	0	0	0	2	4
5	white_projection	LB8	0	0	0	0	635.808	0	0	26	3	52	9	33	0	5	9
5	white_projection	LB9	0	1	0	1	544.112	2	0	52	0	16	4	3	7	1	2
5	white_projection	M1	1	4	1	4	522.246	0	0	1	0	5	0	0	0	1	0
5	white_projection	M3	0	1	0	1	634.808	1	0	1	1	16	0	5	9	4	6
5	white_projection	M4	0	0	0	0	610.042	0	0	55	0	16	2	5	2	0	0
5	white_projection	M5	1	8	4	12	398.251	0	0	12	0	12	0	4	14	3	2
